# Supplementary material for: Activation of the transcription factor carbohydrate-responsive element-binding protein by glucose leads to increased pancreatic beta cell differentiation in rats
Source: Springer Nature journal article supplement (doi:10.1007/s00125-012-2623-0), 2012-07-04
Supplement: MOESM1 [file 8090978]

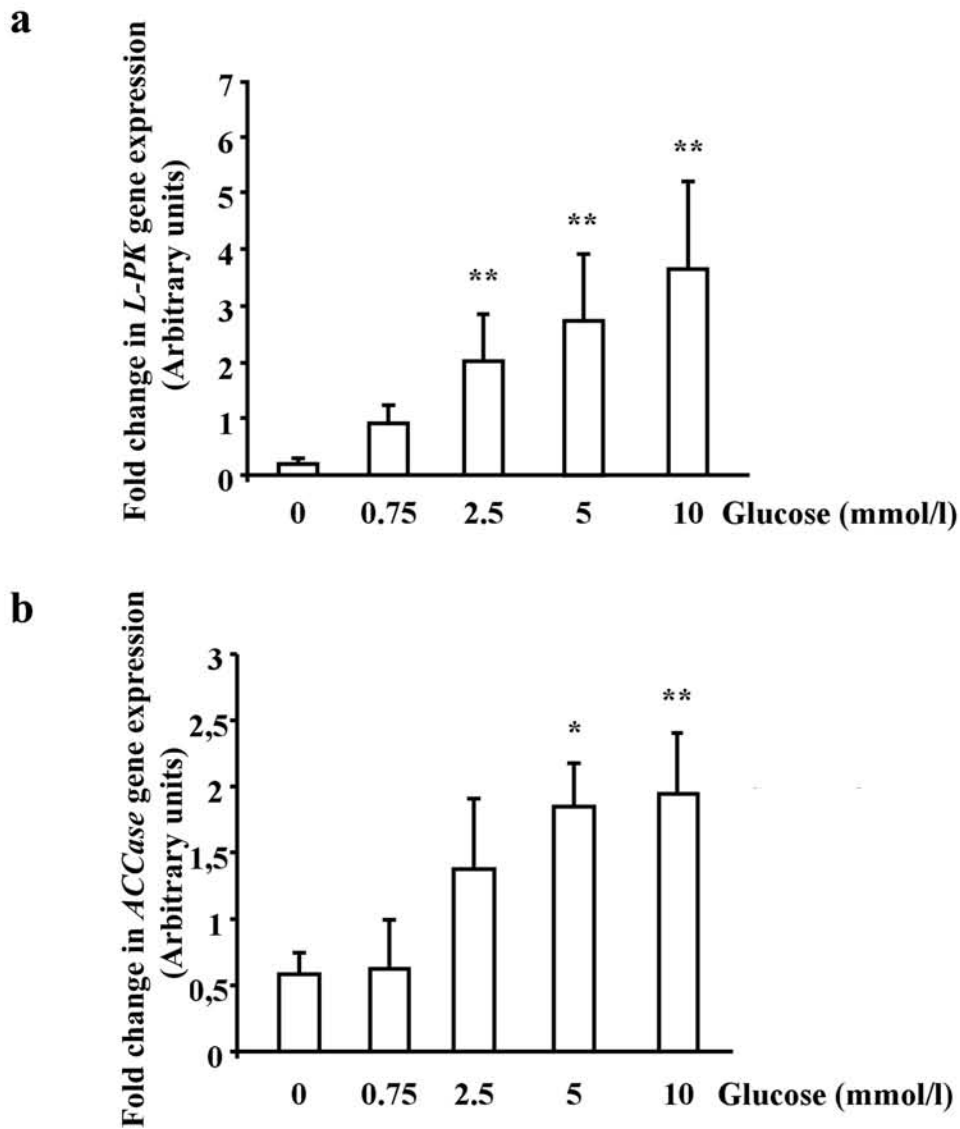

**Figure 1: The expression of *L-PK* and *ACCase*, 2 ChREBP targets, is induced in a glucose dose-dependant manner.**

Quantification by real-time PCR of *L-PK* and *ACCase* mRNA expression in E13.5 pancreases after 7 days of culture with increasing concentrations of glucose (0, 0.75, 2.5, 5 or 10mmol/l). Values are means + S.E.M. of three independent experiments. \*,  $p < 0.05$ ; \*\*,  $p < 0.01$  compared to pancreases cultured in absence of added glucose.
