# Supplementary material for: Activation of the transcription factor carbohydrate-responsive element-binding protein by glucose leads to increased pancreatic beta cell differentiation in rats
Source: Springer Nature journal article supplement (doi:10.1007/s00125-012-2623-0), 2012-07-04
Supplement: MOESM2 [file 8090978]

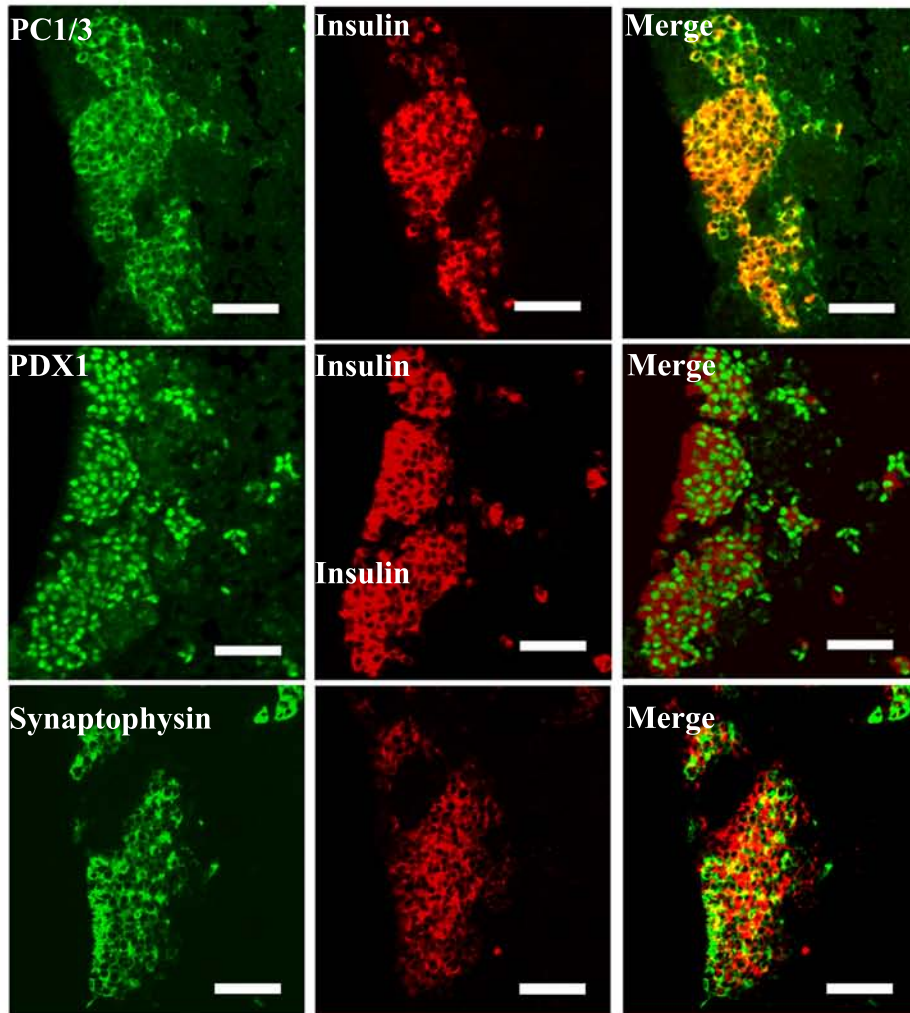

**Figure 2: Insulin -positive cells that developed in presence of xylitol produce functional beta cell markers**

Immunohistochemical analysis of PC1/3, PDX1 and Synaptophysin, three beta cell markers, after 7 days of culture in presence of 10mmol/l xylitol. PC1/3, PDX1 and synaptophysin were revealed in green (left panels); Insulin was revealed in red (middle panel); the merge picture revealed the colocalization of the staining (right panel). Scale bar: 100 $\mu$ m.
