# Supplementary material for: Activation of the transcription factor carbohydrate-responsive element-binding protein by glucose leads to increased pancreatic beta cell differentiation in rats
Source: Springer Nature journal article supplement (doi:10.1007/s00125-012-2623-0), 2012-07-04
Supplement: MOESM5 [file 8090978]

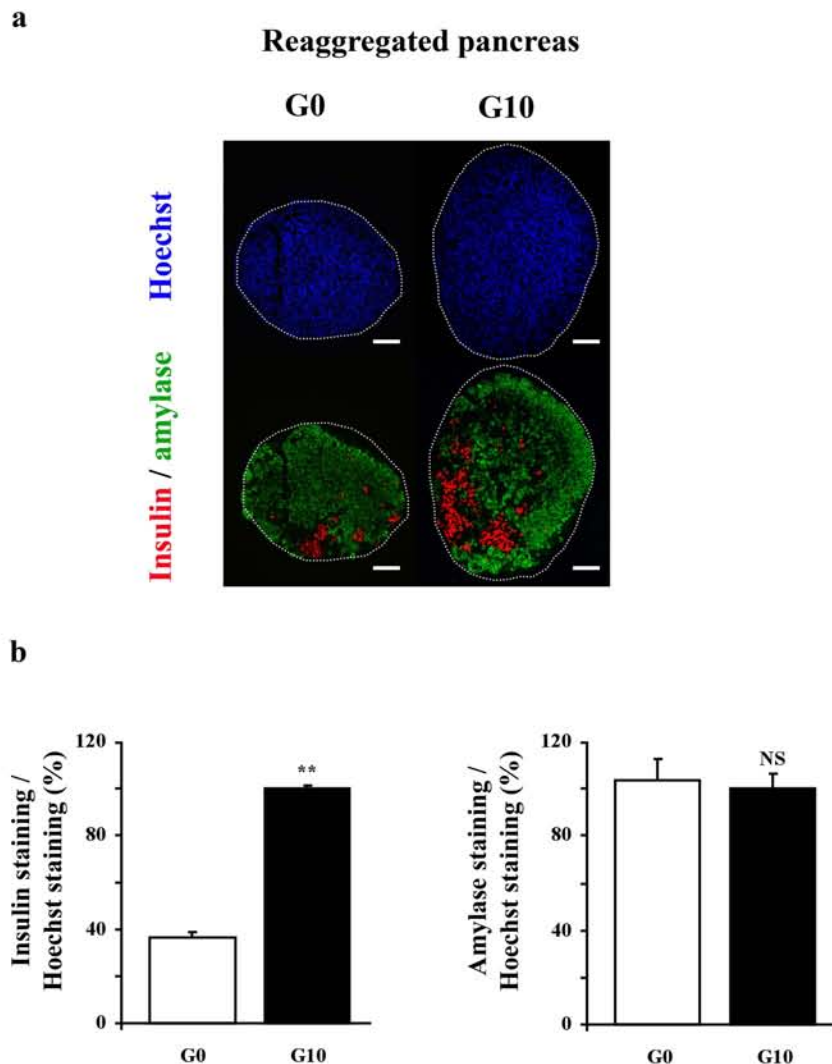

**Figure 5: Glucose controls beta cell differentiation in reaggregated pancreases.**

a: Immunohistological analysis of reaggregated E13.5 rat pancreases, after 7 days of culture in the absence or in the presence of 10mmol/l added glucose. Insulin was revealed in red, amylase in green, and nuclei were stained in blue using a Hoechst dye. Scale bar, 100 $\mu$ m.

b: Left panel – Quantification of the relative surface area occupied by insulin-positive cells after 7 days of culture in the absence or in the presence of 10mmol/l added glucose. Right panel – Quantification of the relative surface area occupied by amylase-positive cells after 7 days of culture in the absence or in the presence of 10mmol/l added glucose.
